# Supplementary material for: Germinated Millet (Pennisetum glaucum (L.) R. Br.) Flour Improved the Gut Function and Its Microbiota Composition in Rats Fed with High-Fat High-Fructose Diet
Source: MDPI journal article supplement (doi:10.3390/ijerph192215217), 2022-11-18
Supplement: s1 [file s1]

## Supplementary Material

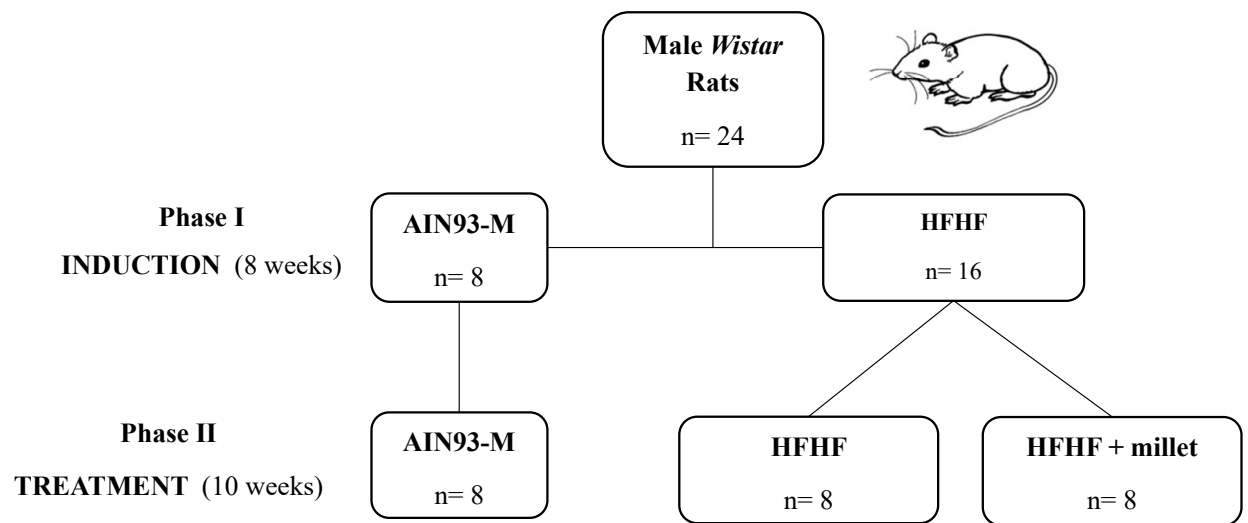

**Figure S1.** Experimental design. The experiment was divided into two stages: Stage 1: induction of metabolic changes: the control group received a standard rodent diet (AIN-93M); and high fat high fructose group (HFHF) received the AIN-93M diet rich in saturated fat (31%) and fructose (20%), for eight weeks. Stage 2: Intervention: control group AIN-93M was maintained and group HFHF was divided into: HFHF group and HFHF + millet group (HFHF with germinated millet flour replacing 43.6% dietary fiber, 100% starch, 36% protein and 39% oil in experimental diet) for 10 weeks.

**Table S1.** Effect of germinated millet flour intake on biochemical variables, markers of inflammation, oxidative stress, and other metabolic alterations, in *Wistar* rats (n = 8), for 10 weeks.

| Variables                | AIN-93M                      | HFHF                        | HFHF+Millet                   |
|--------------------------|------------------------------|-----------------------------|-------------------------------|
| Triglycerides (mg/dL)    | 117.80 ± 20.37 <sup>b</sup>  | 147.80 ± 21.57 <sup>a</sup> | 100.00 ± 17.93 <sup>b</sup>   |
| Glucose (mg/dL)          | 86.00 ± 7.21 <sup>b</sup>    | 100.90 ± 7.82 <sup>a</sup>  | 87.50 ± 14.27 <sup>b</sup>    |
| Insulin (μ UI/mL)        | 13.74 ± 2.37 <sup>b</sup>    | 34.15 ± 7.84 <sup>a</sup>   | 16.49 ± 4.93 <sup>b</sup>     |
| NFκB-p65 (pg/mL)         | 226.70 ± 60.93 <sup>b</sup>  | 346.30 ± 58.88 <sup>a</sup> | 131.90 ± 97.14 <sup>b</sup>   |
| IL-10 (pg/mL)            | 450.30 ± 134.40 <sup>b</sup> | 483.80 ± 91.59 <sup>b</sup> | 1511.00 ± 528.50 <sup>a</sup> |
| PPAR-α (ng/mL)           | 3.63 ± 0.29 <sup>a</sup>     | 3.05 ± 0.20 <sup>b</sup>    | 3.65 ± 0.30 <sup>a</sup>      |
| MDA (nM/mg PTN)          | 351.70 ± 56.96 <sup>b</sup>  | 411.10 ± 47.09 <sup>a</sup> | 343.90 ± 28.98 <sup>b</sup>   |
| SOD (U/mg PTN)           | 1.84 ± 0.29 <sup>b</sup>     | 1.65 ± 0.34 <sup>b</sup>    | 2.14 ± 0.25 <sup>a</sup>      |
| CAT (μmol/min/mL)        | 25.19 ± 7.31 <sup>b</sup>    | 26.13 ± 8.47 <sup>b</sup>   | 35.03 ± 8.22 <sup>a</sup>     |
| TLR4 (ng/mL)             | 7.25 ± 1.14 <sup>b</sup>     | 7.99 ± 1.25 <sup>b</sup>    | 8.99 ± 0.67 <sup>a</sup>      |
| pAKT (U/mL)              | 1.48 ± 0.28 <sup>b</sup>     | 1.76 ± 0.61 <sup>b</sup>    | 3.31 ± 0.77 <sup>a</sup>      |
| Total body fat (g)       | 20.08 ± 2.67 <sup>b</sup>    | 32.89 ± 8.46 <sup>a</sup>   | 24.18 ± 4.45 <sup>b</sup>     |
| Brown adipose tissue (g) | 1.14 ± 0.18 <sup>b</sup>     | 1.23 ± 0.23 <sup>b</sup>    | 1.47 ± 0.16 <sup>a</sup>      |

Line with the different letters indicate significant differences by one-way ANOVA and *post-hoc* of Newman-Keuls test (p<0.05). Values are presented as means and standard deviation. NFκB p65: nuclear factor-kappa B; IL-10: interleukin 10; PPARα: peroxisome proliferator-activated receptor alpha; MDA: malondialdehyde; SOD: superoxide dismutase; CAT: catalase; TLR4: toll-like receptor 4; pAKT: phospho-protein kinase B. AIN-93M: standard diet; HFHF: high-fat high-fructose diet; HFHF + Millet: HFHF diet + 28.63% of germinated millet flour.
